# Supplementary material
Source: PubMed Central journal article supplement (PMC1892969)

**A**

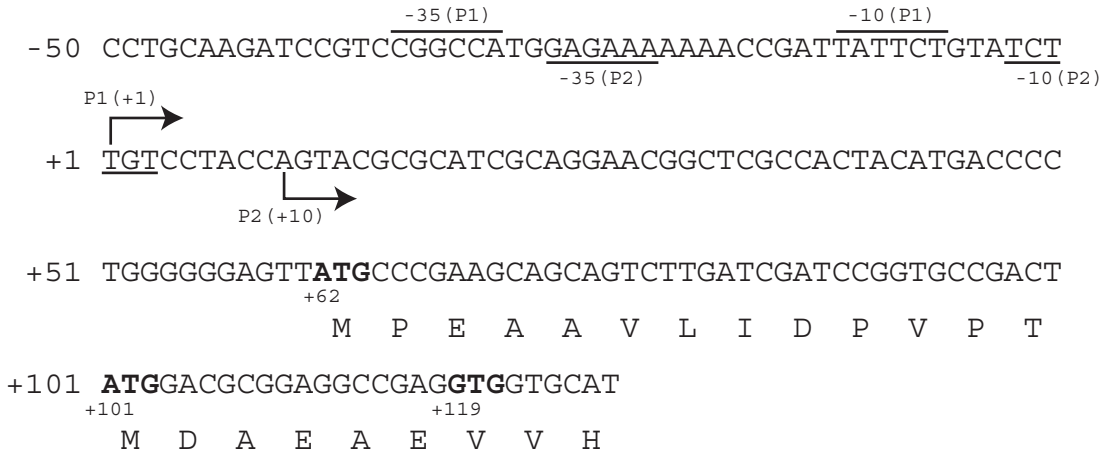

**B**

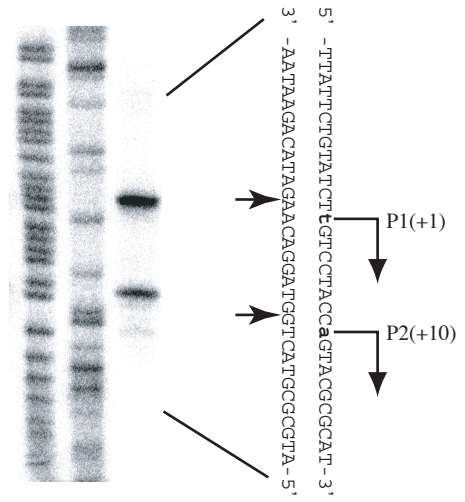

**C**

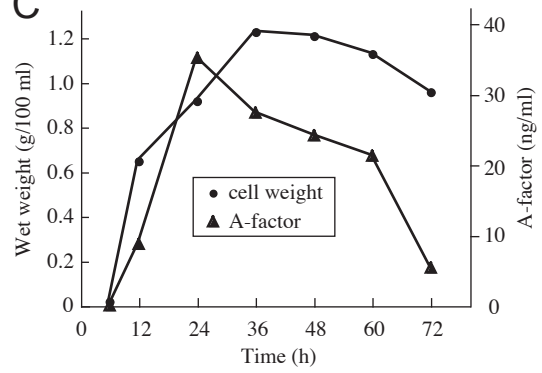

**D**

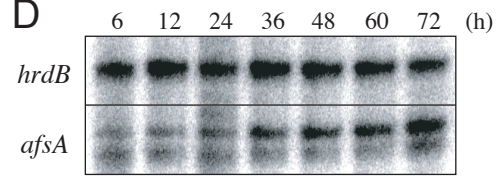

Supplement: pnas_0607472104_2.pdf [file pnas_0607472104_2.pdf]

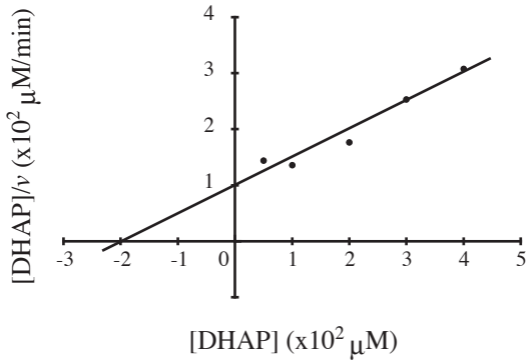

Supplement: pnas_0607472104_3.pdf [file pnas_0607472104_3.pdf]

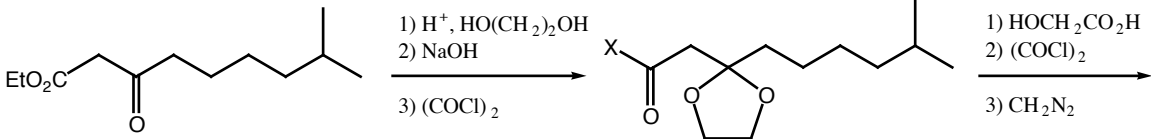

**1**

**2** (X = OEt)

**3** (X = OH)

**4** (X = Cl)

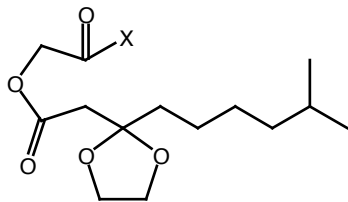

**5** (X = OH)

**6** (X = Cl)

**7** (X =  $\text{CHN}_2$ )

**8**

Supplement: pnas_0607472104_4.pdf [file pnas_0607472104_4.pdf]
